# Supplementary material
Source: Springer Nature journal article supplement (https://www.springermedizin.de/resource/supplementary/12889_2011_3562_MOESM3_ESM.PDF/9489332)
Supplement: MOESM3 [file 9489332]

## Additional file 2

### Description of additional studies with complementary data for Armstrong Schellenberg 2004 study

| <b>Study</b>           | <b>Adam 2005</b>                                                                                                                                                                                                                                                                                                                          |
|------------------------|-------------------------------------------------------------------------------------------------------------------------------------------------------------------------------------------------------------------------------------------------------------------------------------------------------------------------------------------|
| Design                 | Cost Effectiveness Analysis                                                                                                                                                                                                                                                                                                               |
| Participants           | 4 rural districts; 2 intervention districts having received IMCI for 2 years before the study was conducted and 2 control districts with routine case management                                                                                                                                                                          |
| Interventions          | Integrated Management of Childhood Illness                                                                                                                                                                                                                                                                                                |
| Outcomes               | i) Total economic costs of start up and implementation of IMCI in a district; ii) Incremental costs of introducing and running IMCI                                                                                                                                                                                                       |
| Country                | Tanzania                                                                                                                                                                                                                                                                                                                                  |
| Notes                  | IMCI; complementary to Armstrong Schellenberg 2004                                                                                                                                                                                                                                                                                        |
| Allocation concealment | Not applicable                                                                                                                                                                                                                                                                                                                            |
| Study quality          | Not applicable                                                                                                                                                                                                                                                                                                                            |
| <b>Study</b>           | <b>Bryce2005</b>                                                                                                                                                                                                                                                                                                                          |
| Design                 | Non-randomised Controlled Trial                                                                                                                                                                                                                                                                                                           |
| Participants           | 4 rural districts; 2 intervention districts having received IMCI for 2 years before the study was conducted and 2 control districts with routine case management                                                                                                                                                                          |
| Interventions          | Integrated Management of Childhood Illness                                                                                                                                                                                                                                                                                                |
| Outcomes               | i) Costs at national, district, facility and household levels; ii) Quality of care using a newly developed composite measure for 'correct management of childhood illness' defined as the proportion of children managed correctly for all presenting conditions and without inappropriate prescribing of antibiotics or anti-diarrhoeals |
| Country                | Tanzania                                                                                                                                                                                                                                                                                                                                  |
| Notes                  | IMCI; complementary to Armstrong Schellenberg 2004                                                                                                                                                                                                                                                                                        |
| Allocation concealment | Not applicable                                                                                                                                                                                                                                                                                                                            |
| Study quality          | Not applicable                                                                                                                                                                                                                                                                                                                            |
